# Supplementary material
Source: Elsevier journal article supplement (https://www.sciencedirect.com/science/article/pii/S0034935620301493)
Supplement: mmc1 [file S0034935620301493:mmc1.docx]

**Anexo A**

**Escala de Intensidad de Náusea y Vómito Postoperatorio adaptada al español**

| **Evaluación** | **Puntuación** |
| --- | --- |
| 1. **Hasta las 6 horas después de una cirugía (o de la hora de alta, en caso de cirugía ambulatoria)**   P1 ¿Ha vomitado o experimentado arcadas?  a) No  b) Una o dos veces  c) Tres o más veces  P2 ¿Ha experimentado una sensación de náusea (una sensación inestable en el estómago y una ligera necesidad de vomitar?) Si la respuesta es **sí**, ¿la sensación de nausea interfiere con sus actividades cotidianas, como salir de la cama, poder moverse en la cama con libertad, poder caminar con normalidad o comer e ingerir líquidos?  a) No  b) A veces  c) A menudo o la mayor parte del tiempo  d) Todo el tiempo  P3 Las náuseas son principalmente:  a) Variables (”aparecen y desaparecen “)?  b) Constantes (“están casi siempre presentes”) ?  P4 ¿Cuánto duró su sensación de náusea (en horas total o fracción)? | 0  2  50  0  1  2  25  1  2  __: __h |
| Para la parte A, si la respuesta a la P1= c) puntuación A= 50; de otro modo, seleccione el puntaje más alto de la P1 o de la P2, luego multiplíquela por la P3 y por P4 | Puntuación de intensidad según la NVPO (0-6h)  A = |

| **Puntuación final** | **Puntuación** |
| --- | --- |
| Se define una NVPO clínicamente importante si tiene una puntuación total de ≥ 50 en cualquier momento a lo largo del periodo de estudio. Los puntajes de 6 y 24 (y, si se considera importante en el contexto clínico, 72) horas pueden añadirse para la cuantificación de todo el periodo, o subescalas usadas para cada periodo. | Puntuación final de intensidad según la NVPO (0-72 horas) |
| A + B + C |  |
